# Supplementary material
Source: PubMed Central journal article supplement (PMC5216617)
Supplement: supp_ddw222_KI_TA_Syn_Staining_061116.pdf [file supp_ddw222_KI_TA_Syn_Staining_061116.pdf]

**Supplemental Table 1.** Measures of junctional histopathology for NMJs in the TA of the KI Model based on synaptophysin and AChR co-staining of Junctions. Values shown are mean±SEM of 20 junctions from 5-6 mice/group. Statistically significant values denoted in bold font.

| Measure (% of Junctions)             | WT           | KI           | p            |
|--------------------------------------|--------------|--------------|--------------|
| Denervation: None                    | 98.00±1.22   | 93.33±4.01   | 0.334        |
| Denervation: Partial                 | 2.00±1.22    | 6.67±4.01    | 0.334        |
| Denervation: Complete                | 0.00±0.00    | 0.00±0.00    | N/A          |
| Fragmentation: None                  | 81.00±6.40   | 81.67±6.15   | 0.942        |
| Fragmentation: Partial               | 20.00±5.70   | 17.50±6.16   | 0.776        |
| Fragmentation: Complete              | 0.00±0.00    | 0.83±0.83    | 0.389        |
| Synaptophysin Intensity: Intense     | 40.00±7.25   | 65.00±5.16   | <b>0.018</b> |
| Synaptophysin Area                   | 158.08±23.45 | 215.75±11.64 | <b>0.045</b> |
| Endplate Area                        | 333.62±16.10 | 297.88±19.07 | 0.196        |
| Synaptophysin to Endplate Area Ratio | 0.50±0.07    | 0.77±0.04    | <b>0.005</b> |
| Muscle Fiber Diameter                | 44.28±2.85   | 42.37±2.85   | 0.649        |
